# Supplementary material for: Phenotypic characterization of circulating tumor cells in the peripheral blood of patients with small cell lung cancer
Source: PubMed Central journal article supplement (PMC5515424; doi:10.1371/journal.pone.0181211), 2017-07-18
Supplement: pone.0181211.s008.pdf [file pone.0181211.s008.pdf]

**S3 Table**

|                | CellSearch (N=83) |                      |                       |                   |          | Immunofluorescence (N=108)             |                                        |          |                                       |                                       |          |                                       |                                       |          |
|----------------|-------------------|----------------------|-----------------------|-------------------|----------|----------------------------------------|----------------------------------------|----------|---------------------------------------|---------------------------------------|----------|---------------------------------------|---------------------------------------|----------|
|                | All patients      | ≥5CTC (%)<br>(N= 50) | <5CTCs (%)<br>(N= 33) | Median<br>(range) | <i>p</i> | CK <sup>+</sup> /<br>Ki67 <sup>+</sup> | CK <sup>+</sup> /<br>Ki67 <sup>-</sup> | <i>p</i> | CK <sup>+</sup> /<br>M30 <sup>+</sup> | CK <sup>+</sup> /<br>M30 <sup>-</sup> | <i>p</i> | CK <sup>+</sup> /<br>Vim <sup>+</sup> | CK <sup>+</sup> /<br>Vim <sup>-</sup> | <i>p</i> |
| <b>CR/PR</b>   | 77 (71,3)         | 32 (38,6)            | 28 (33,7%)            | 8 (0-10000)       |          | 39 (36,1)                              | 38 (35,2)                              |          | 13 (64,0)                             | 64 (59,3)                             |          | 40 (37,0)                             | 37 (34,3)                             |          |
| <b>SD</b>      | 11 (10,2)         | 6 (7,2)              | 4 (4,8%)              | 12 (0-4544)       | 0,003    | 3 (2,8)                                | 8 (7,4)                                | 0,21     | 2 (1,9)                               | 9 (8,3)                               | 0,49     | 3 (2,8)                               | 8 (7,4)                               | 0,084    |
| <b>PD</b>      | 14 (13,0)         | 9 (10,8)             | 1 (1,2%)              | 123 (4-7600)      |          | 12 (11,1)                              | 2 (1,9)                                |          | 3 (2,8)                               | 11 (10,2)                             |          | 11 (10,2)                             | 3 (2,8)                               |          |
| <b>Unknown</b> | 6 (5,6)           | 3 (3,6)              | 0 (0,0%)              | 89 (18-228)       |          | 3 (2,8)                                | 3 (2,8)                                |          | 0 (0,0)                               | 6 (5,6)                               |          | 3 (2,8)                               | 3 (2,8)                               |          |
